# Supplementary material for: Monitoring the formation of carbide crystal phases during the thermal decomposition of 3d transition metal dicarboxylate complexes
Source: Royal Society of Chemistry journal article supplement (doi:10.1039/c4dt01207k), 2014-01-01
Supplement: c4dt01207k1.pdf [file c4dt01207k1.pdf]

# Monitoring the Formation of Carbide Crystal Phases during the Thermal Decomposition of 3d Transition Metal Dicarboxylate Complexes

Zachary J. Huba and Everett E. Carpenter\*

5

1001 W. Main Street, Richmond, Va 23284, USA;

\*E-mail:ecarpenter2@vcu.edu

## Electronic Supplementary Information

10

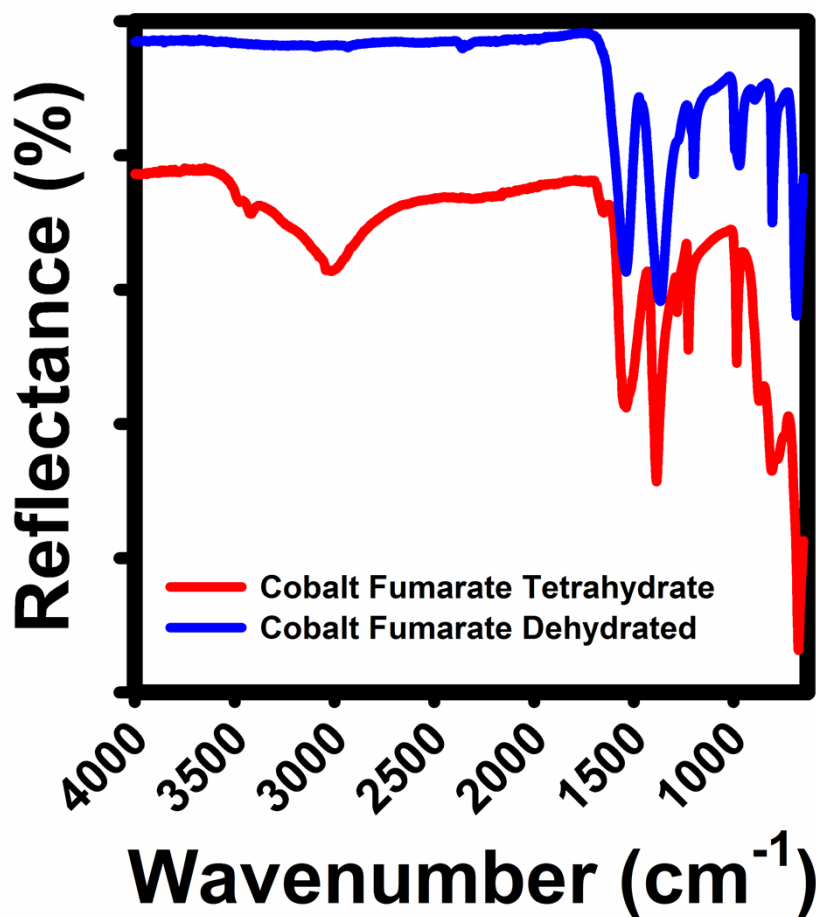

15

Figure S1. FT-IR spectra of Cobalt Fumarate tetrahydrate and Cobalt Fumarate Anhydrous powders.

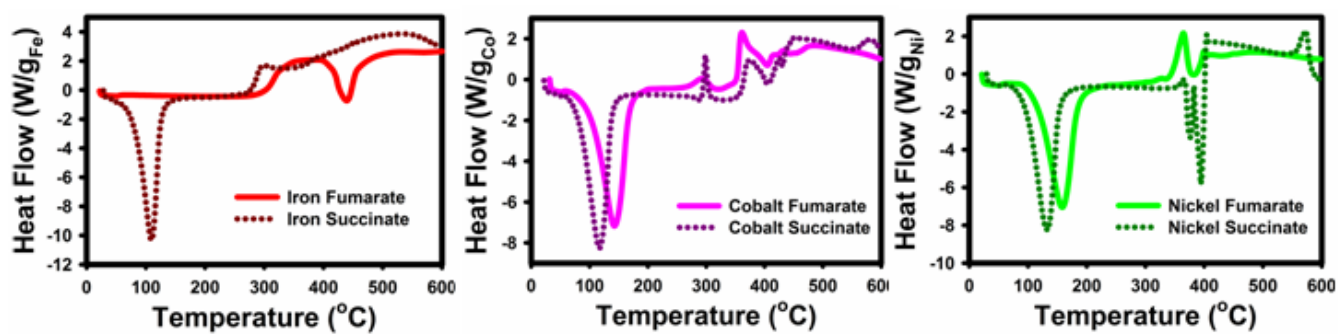

Figure S2. Differential Scanning Calorimetry thermograms for Fe, Co, and Ni fumarate and succinate complexes.

5

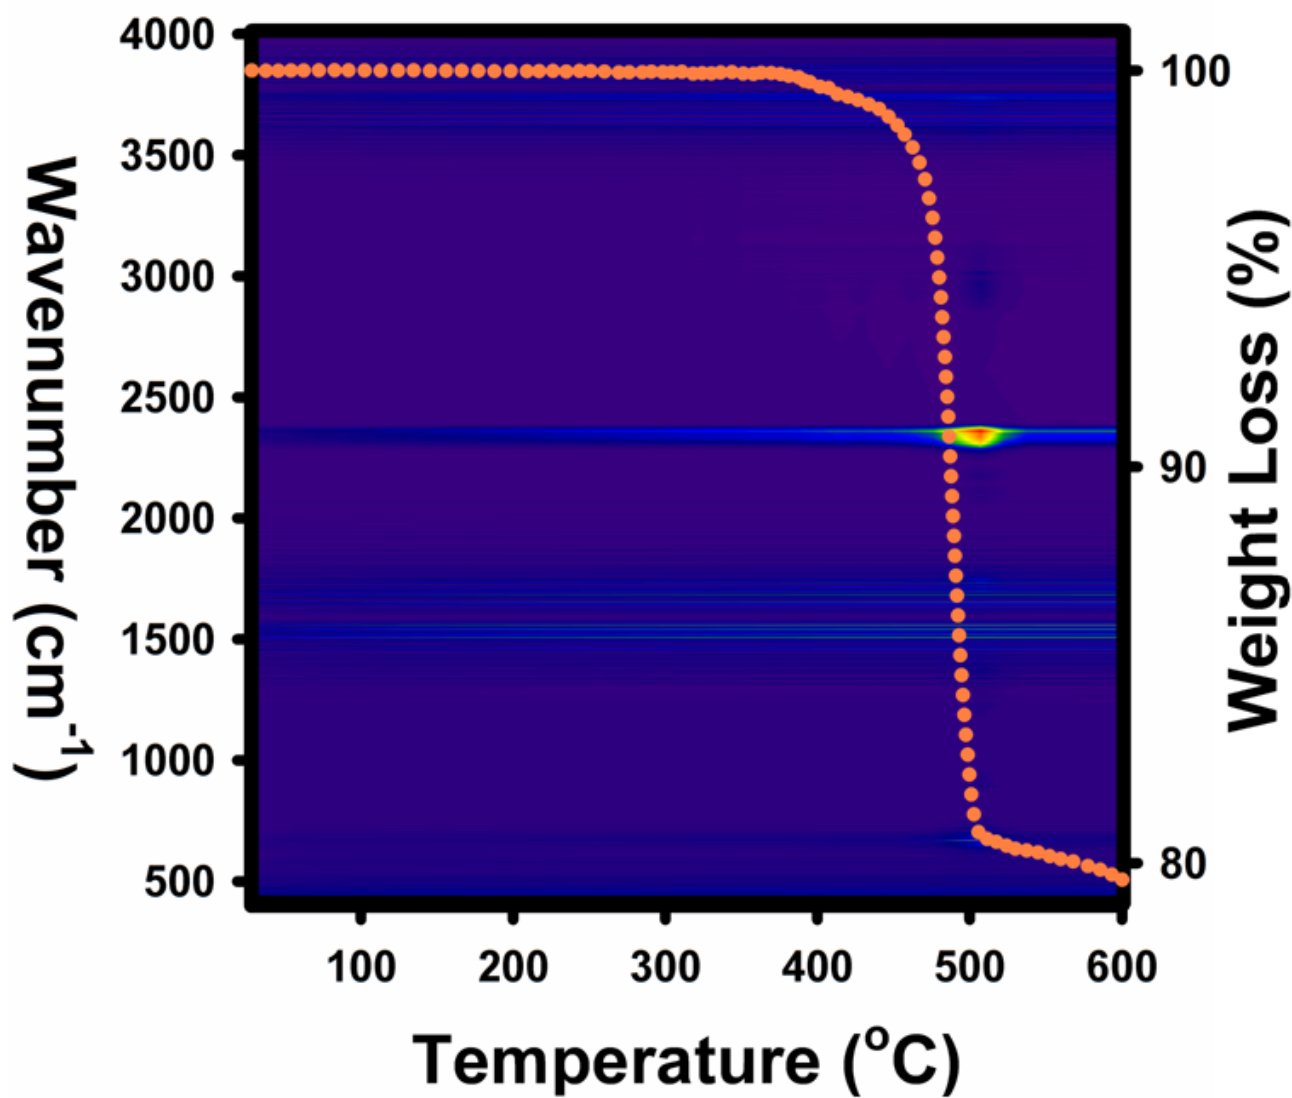

Figure S3. TGA-IR contour plot of the decomposition of Na<sub>2</sub>Fumarate

10

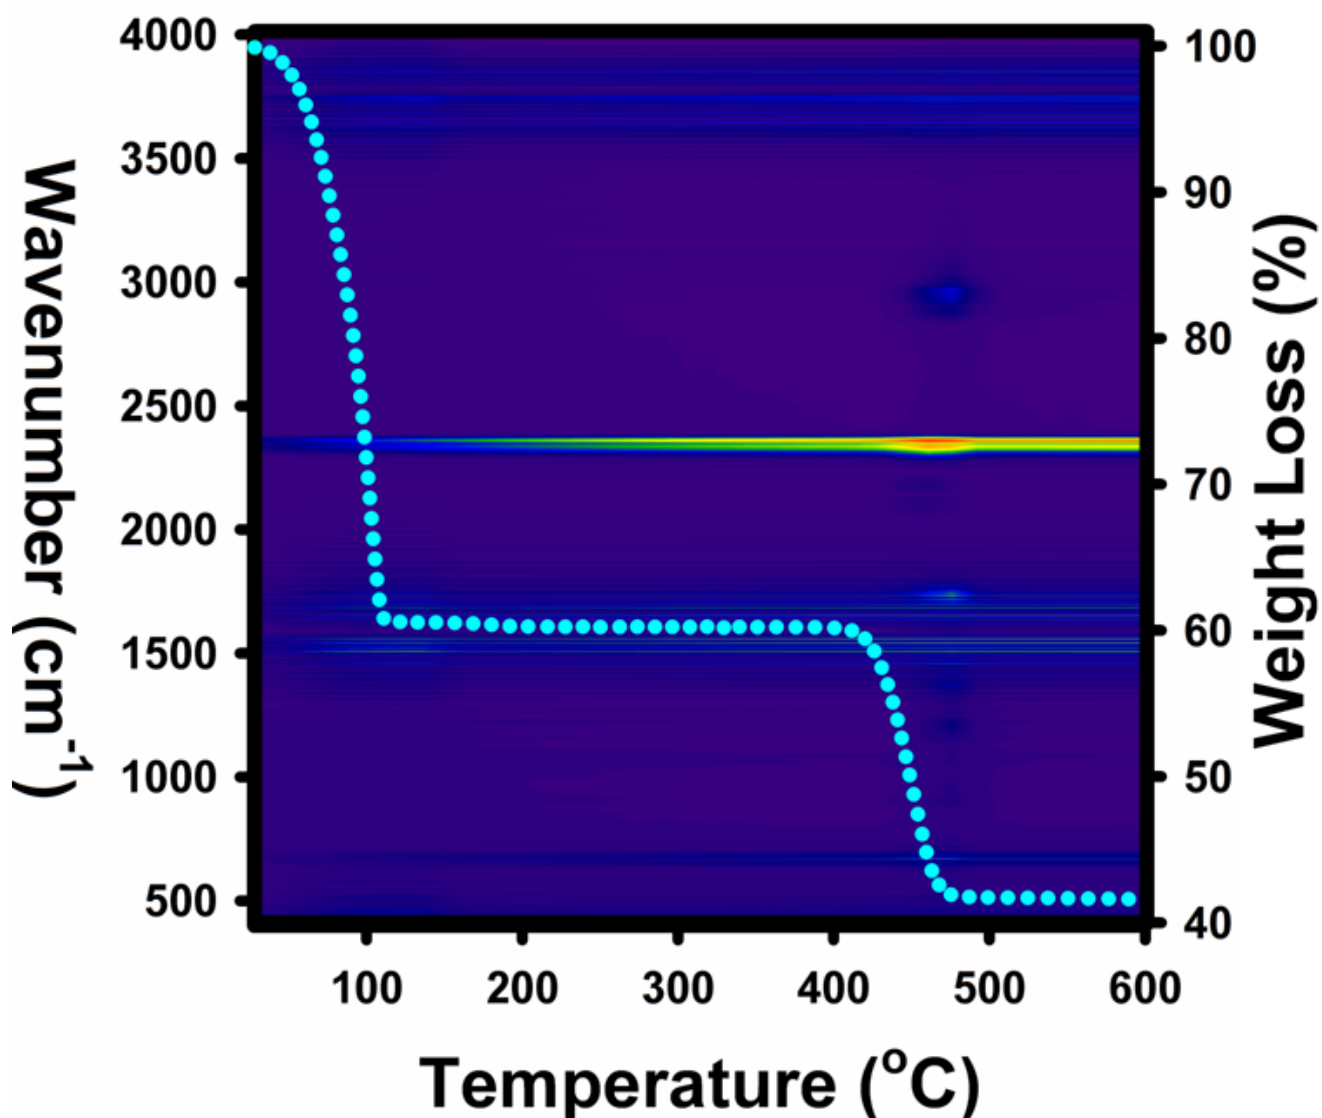

Figure S4. TGA-IR contour plot of the decomposition of Na<sub>2</sub>Succinate tetrahydrate

Table S1. Crystallographic parameters for phases observed during Ni succinate decomposition at 350 °C

| <i>Phase</i>           | <i>Space Group</i>   | <i>Lattice Parameters (Å)</i> |          |          | <i>Wyckoff Positions</i> | <i>Atomic Coordinates</i> |          |          |
|------------------------|----------------------|-------------------------------|----------|----------|--------------------------|---------------------------|----------|----------|
|                        |                      | <i>a</i>                      | <i>b</i> | <i>c</i> |                          | <i>x</i>                  | <i>y</i> | <i>z</i> |
| <b>FCC-Ni</b>          | Fm-3m                | 3.539                         | -        | -        | Ni – 4a                  | 0                         | 0        | 0        |
| <b>HCP-Ni</b>          | P <sub>63</sub> /mmc | 2.503                         | -        | 4.090    | Ni – 2c                  | 0.33                      | 0.66     | 0.25     |
| <b>Ni<sub>3</sub>C</b> | R-3c                 | 4.582                         | -        | 13.03    | Ni – 18e                 | 0.33                      | 0        | 0.25     |
|                        |                      |                               |          |          | C – 6b                   | 0                         | 0        | 0        |
